# Supplementary material for: Tinnitus-related distress after multimodal treatment can be characterized using a key subset of baseline variables
Source: PLOS journal article supplement (doi:10.1371/journal.pone.0228037), 2020-01-30
Supplement: S1 (10.1371/journal.pone.0228037.s001) [file journal.pone.0228037.s001]

**S1 Table. Feature overview.** A listing of all 205 features that were used for classifier training. These features were extracted at baseline (T0) and after treatment (T1), comprising answers to single questionnaire items, subscale scores and total scores from the following questionnaires: (a) General Depression Scale - long form (Allgemeine Depressionsskala; ADSL) [1,2], (b) Berlin Complaint Inventory (Berliner Beschwerdeinventar; BI) [3], (c) Berlin Mood Questionnaire (Berliner Stimmungsfragebogen; BSF) [4], (d) Perceived Stress Questionnaire (PSQ) [5], (e) Short Form-8 Health Survey (SF8) [6], (f) a sociodemographics questionnaire (SOZK) [7], (g) Self-Efficacy- Optimism-Pessimism Scale (Selbstwirksamkeits-Optimismus-Pessimismus Skala; SWOP) [8], (h) visual analogue scales measuring tinnitus loudness, frequency and distress (TINSKAL) and the (i) Tinnitus Localization and Quality questionnaire (TLQ) [9].

| No. | Feature         | Description                                                                                                  | Response options                                               |
|-----|-----------------|--------------------------------------------------------------------------------------------------------------|----------------------------------------------------------------|
| 1   | ADSL_lie        | Lie detection score                                                                                          | -                                                              |
| 2   | ADSL_depression | Depressive disorder sum score                                                                                | -                                                              |
| 3   | ADSL_adsl01     | "During the past week I was bothered by things that usually don't bother me."                                | 0=rarely; 1=some; 2=occasionally; 3=most                       |
| 4   | ADSL_adsl02     | "During the past week I did not feel like eating; my appetite was poor."                                     | same as #3                                                     |
| 5   | ADSL_adsl03     | "During the past week I felt that I could not shake off the blues even with help from my family or friends." | same as #3                                                     |
| 6   | ADSL_adsl04     | "During the past week I felt I was just as good as other people."                                            | 0=most; 1=occasionally; 2=some; 3=rarely                       |
| 7   | ADSL_adsl05     | "During the past week I had trouble keeping my mind on what I was doing."                                    | same as #3                                                     |
| 8   | ADSL_adsl06     | "During the past week I felt depressed."                                                                     | same as #3                                                     |
| 9   | ADSL_adsl07     | "During the past week I felt that everything I did was an effort."                                           | same as #3                                                     |
| 10  | ADSL_adsl08     | "During the past week I felt hopeful about the future."                                                      | same as #6                                                     |
| 11  | ADSL_adsl09     | "During the past week I thought my life had been a failure."                                                 | same as #3                                                     |
| 12  | ADSL_adsl10     | "During the past week I felt fearful."                                                                       | same as #3                                                     |
| 13  | ADSL_adsl11     | "During the past week my sleep was restless."                                                                | same as #3                                                     |
| 14  | ADSL_adsl12     | "During the past week I was happy."                                                                          | same as #6                                                     |
| 15  | ADSL_adsl13     | "During the past week I talked less than usual."                                                             | same as #3                                                     |
| 16  | ADSL_adsl14     | "During the past week I felt lonely."                                                                        | same as #3                                                     |
| 17  | ADSL_adsl15     | "During the past week people were unfriendly."                                                               | same as #3                                                     |
| 18  | ADSL_adsl16     | "During the past week I enjoyed life."                                                                       | same as #6                                                     |
| 19  | ADSL_adsl17     | "During the past week I had crying spells."                                                                  | same as #3                                                     |
| 20  | ADSL_adsl18     | "During the past week I felt sad."                                                                           | same as #3                                                     |
| 21  | ADSL_adsl19     | "During the past week I felt that people disliked me."                                                       | same as #3                                                     |
| 22  | ADSL_adsl20     | "During the past week I could not get going."                                                                | same as #3                                                     |
| 23  | ADSL_timestamp  | ADSL: avg. time needed to fill an item (in secs)                                                             | -                                                              |
| 24  | BI_complaint    | Complaint stress score                                                                                       | -                                                              |
| 25  | BI_exhaust      | Exhaustion score                                                                                             | -                                                              |
| 26  | BI_gbb01        | Exhaustion - feeling of faintness                                                                            | 0=not at all; 1=hardly; 2=somewhat; 3=considerably; 4=severely |
| 27  | BI_gbb02        | Heart complaint - palpitation, tachycardia or arrhythmia                                                     | same as #26                                                    |

Continued on next page

| No. | Feature          | Description                                               | Response options                                          |
|-----|------------------|-----------------------------------------------------------|-----------------------------------------------------------|
| 28  | BI_gbb03         | Epigastralgia - feeling of pressure or abdominal bloating | same as #26                                               |
| 29  | BI_gbb07         | Exhaustion - exaggeratedly in need of sleep               | same as #26                                               |
| 30  | BI_gbb09         | Limb pain - joint pain or limb pain                       | same as #26                                               |
| 31  | BI_gbb10         | Heart complaint - vertigo                                 | same as #26                                               |
| 32  | BI_gbb11         | Limb pain - sacroiliac pain or backache                   | same as #26                                               |
| 33  | BI_gbb13         | Limb pain - cervicalgia or shoulder pain                  | same as #26                                               |
| 34  | BI_gbb15         | Epigastralgia - vomition                                  | same as #26                                               |
| 35  | BI_gbb18         | Epigastralgia - nausea                                    | same as #26                                               |
| 36  | BI_gbb20         | Heart complaint - globus sensation, pokiness or gagging   | same as #26                                               |
| 37  | BI_gbb23         | Epigastralgia - ructus                                    | same as #26                                               |
| 38  | BI_gbb25         | Epigastralgia - heartburn or acid belching                | same as #26                                               |
| 39  | BI_gbb27         | Limb pain - headache                                      | same as #26                                               |
| 40  | BI_gbb29         | Exhaustion - rapid exhaustibility                         | same as #26                                               |
| 41  | BI_gbb32         | Exhaustion - fatigue                                      | same as #26                                               |
| 42  | BI_gbb36         | Exhaustion - dazed feeling                                | same as #26                                               |
| 43  | BI_gbb41         | Limb pain - feeling of heaviness or tiredness in legs     | same as #26                                               |
| 44  | BI_gbb42         | Exhaustion - languor                                      | same as #26                                               |
| 45  | BI_gbb45         | Heart complaint - stitches, breast pain                   | same as #26                                               |
| 46  | BI_gbb51         | Epigastralgia - stomachache                               | same as #26                                               |
| 47  | BI_gbb52         | Heart complaint - asthma                                  | same as #26                                               |
| 48  | BI_gbb55         | Limb pain - feeling of pressure in head                   | same as #26                                               |
| 49  | BI_gbb56         | Heart complaint - heart complaint in spasms               | same as #26                                               |
| 50  | BI_limbs         | Limb pain score                                           | -                                                         |
| 51  | BI_heart         | Heart complaint score                                     | -                                                         |
| 52  | BI_epigastralgia | Epigastralgia score                                       | -                                                         |
| 53  | BI_timestamp     | BI: avg. time needed to fill an item (in secs)            | -                                                         |
| 54  | BSF_anger        | Anger score                                               | -                                                         |
| 55  | BSF_anx_depress  | Anxious depressiveness score                              | -                                                         |
| 56  | BSF_bsf01        | Fatigue - faint                                           | 0=not at all; 1=somewhat; 2=rather; 3=mainly; 4=very much |
| 57  | BSF_bsf02        | Engagement - focused                                      | same as #56                                               |
| 58  | BSF_bsf03        | Lightened mood - relaxed                                  | same as #56                                               |
| 59  | BSF_bsf04        | Apathy - indifferent                                      | same as #56                                               |
| 60  | BSF_bsf05        | Anxious depression - worried                              | same as #56                                               |
| 61  | BSF_bsf06        | Anger - irritable                                         | same as #56                                               |
| 62  | BSF_bsf07        | Fatigue - slack                                           | same as #56                                               |
| 63  | BSF_bsf08        | Anger - belligerent                                       | same as #56                                               |
| 64  | BSF_bsf09        | Apathy - uninvolved                                       | same as #56                                               |
| 65  | BSF_bsf10        | Lightened mood - cheerful                                 | same as #56                                               |
| 66  | BSF_bsf11        | Fatigue - tired                                           | same as #56                                               |
| 67  | BSF_bsf12        | Anxious depression - concerned                            | same as #56                                               |
| 68  | BSF_bsf13        | Engagement - deliberate                                   | same as #56                                               |
| 69  | BSF_bsf14        | Anger - edgy                                              | same as #56                                               |
| 70  | BSF_bsf15        | Lightened mood - buoyant                                  | same as #56                                               |
| 71  | BSF_bsf16        | Apathy - bored                                            | same as #56                                               |
| 72  | BSF_bsf17        | Fatigue - haggard                                         | same as #56                                               |

Continued on next page

| No. | Feature        | Description                                                                 | Response options                                      |
|-----|----------------|-----------------------------------------------------------------------------|-------------------------------------------------------|
| 73  | BSF_bsf18      | Engagement - sympathetic                                                    | same as #56                                           |
| 74  | BSF_bsf19      | Anger - angry                                                               | same as #56                                           |
| 75  | BSF_bsf20      | Lightened mood - composed                                                   | same as #56                                           |
| 76  | BSF_bsf21      | Anger - aggressive                                                          | same as #56                                           |
| 77  | BSF_bsf22      | Apathy - apathetic                                                          | same as #56                                           |
| 78  | BSF_bsf23      | Anxious depression - insecure                                               | same as #56                                           |
| 79  | BSF_bsf24      | Anxious depression - depressed                                              | same as #56                                           |
| 80  | BSF_bsf25      | Engagement - helpful                                                        | same as #56                                           |
| 81  | BSF_bsf26      | Lightened mood - jolly                                                      | same as #56                                           |
| 82  | BSF_bsf27      | Engagement - considerate                                                    | same as #56                                           |
| 83  | BSF_bsf28      | Apathy - disinterested                                                      | same as #56                                           |
| 84  | BSF_bsf29      | Fatigue - flaccid                                                           | same as #56                                           |
| 85  | BSF_bsf30      | Anxious depression - saddened                                               | same as #56                                           |
| 86  | BSF_engagement | Engagement score                                                            | -                                                     |
| 87  | BSF_mood       | Lightened mood score                                                        | -                                                     |
| 88  | BSF_fatigue    | Fatigue score                                                               | -                                                     |
| 89  | BSF_timestamp  | BSF: avg. time needed to fill an item (in secs)                             | -                                                     |
| 90  | BSF_apathy     | Apathy score                                                                | -                                                     |
| 91  | PSQ_demand     | Demand score                                                                | -                                                     |
| 92  | PSQ_tension    | Tension score                                                               | -                                                     |
| 93  | PSQ_joy        | Joy score                                                                   | -                                                     |
| 94  | PSQ_stress     | Stress sum score                                                            | -                                                     |
| 95  | PSQ_worries    | Worries score                                                               | -                                                     |
| 96  | PSQ_stress01   | "You feel rested."                                                          | 1=hardly ever;<br>2=rarely; 3=frequently;<br>4=mostly |
| 97  | PSQ_stress02   | "You feel that too many demands are being made on you."                     | same as #96                                           |
| 98  | PSQ_stress03   | "You are irritable or grouchy."                                             | same as #96                                           |
| 99  | PSQ_stress04   | "You have too many things to do."                                           | same as #96                                           |
| 100 | PSQ_stress05   | "You feel lonely or isolated."                                              | same as #96                                           |
| 101 | PSQ_stress06   | "You find yourself in situations of conflict."                              | same as #96                                           |
| 102 | PSQ_stress07   | "You feel you're doing things you really like."                             | same as #96                                           |
| 103 | PSQ_stress08   | "You feel tired."                                                           | same as #96                                           |
| 104 | PSQ_stress09   | "You fear you may not manage to attain your goals."                         | same as #96                                           |
| 105 | PSQ_stress10   | "You feel calm."                                                            | same as #96                                           |
| 106 | PSQ_stress11   | "You have too many decisions to make."                                      | same as #96                                           |
| 107 | PSQ_stress12   | "You feel frustrated."                                                      | same as #96                                           |
| 108 | PSQ_stress13   | "You are full of energy."                                                   | same as #96                                           |
| 109 | PSQ_stress14   | "You feel tense."                                                           | same as #96                                           |
| 110 | PSQ_stress15   | "Your problems seem to be piling up."                                       | same as #96                                           |
| 111 | PSQ_stress16   | "You feel you're in a hurry."                                               | same as #96                                           |
| 112 | PSQ_stress17   | "You feel safe and protected."                                              | same as #96                                           |
| 113 | PSQ_stress18   | "You have many worries."                                                    | same as #96                                           |
| 114 | PSQ_stress19   | "You are under pressure from other people."                                 | same as #96                                           |
| 115 | PSQ_stress20   | "You feel discouraged."                                                     | same as #96                                           |
| 116 | PSQ_stress21   | "You enjoy yourself."                                                       | same as #96                                           |
| 117 | PSQ_stress22   | "You are afraid for the future."                                            | same as #96                                           |
| 118 | PSQ_stress23   | "You feel you're doing things because you have to not because you want to." | same as #96                                           |

Continued on next page

| No. | Feature            | Description                                                                                                                                          | Response options                                                                           |
|-----|--------------------|------------------------------------------------------------------------------------------------------------------------------------------------------|--------------------------------------------------------------------------------------------|
| 119 | PSQ_stress24       | “You feel criticized or judged.”                                                                                                                     | same as #96                                                                                |
| 120 | PSQ_stress25       | “You are lighthearted.”                                                                                                                              | same as #96                                                                                |
| 121 | PSQ_stress26       | “You feel mentally exhausted.”                                                                                                                       | same as #96                                                                                |
| 122 | PSQ_stress27       | “You have trouble relaxing.”                                                                                                                         | same as #96                                                                                |
| 123 | PSQ_stress28       | “You feel loaded down with responsibility.”                                                                                                          | same as #96                                                                                |
| 124 | PSQ_stress29       | “You have enough time for yourself.”                                                                                                                 | same as #96                                                                                |
| 125 | PSQ_stress30       | “You feel under pressure from deadlines.”                                                                                                            | same as #96                                                                                |
| 126 | PSQ_timestamp      | PSQ: avg. time needed to fill an item (in secs)                                                                                                      | -                                                                                          |
| 127 | SF8_bodily_health  | Bodily pain score                                                                                                                                    | -                                                                                          |
| 128 | SF8_genhealth      | General health score                                                                                                                                 | -                                                                                          |
| 129 | SF8_mental         | Mental health summary score                                                                                                                          | -                                                                                          |
| 130 | SF8_mentalhealth   | Mental health score                                                                                                                                  | -                                                                                          |
| 131 | SF8_physicalhealth | Physical health summary score                                                                                                                        | -                                                                                          |
| 132 | SF8_physicalfunc   | Physical functioning score                                                                                                                           | -                                                                                          |
| 133 | SF8_emotional      | Role emotional score                                                                                                                                 | -                                                                                          |
| 134 | SF8_physical       | Role physical score                                                                                                                                  | -                                                                                          |
| 135 | SF8_social         | Social functioning score                                                                                                                             | -                                                                                          |
| 136 | SF8_sf01           | “Overall, how would you rate your health during the past week?”                                                                                      | 1=excellent; 2=very good; 3=good; 4=fair; 5=poor; 6=very poor                              |
| 137 | SF8_sf02           | “During the past 4 weeks, how much did physical health problems limit your physical activities (such as walking or climbing stairs)?”                | 1=not at all; 2=very little; 3=somewhat; 4=quite a lot; 5=could not do physical activities |
| 138 | SF8_sf03           | “During the past 4 weeks, how much difficulty did you have doing your daily work, both at home and away from home, because of your physical health?” | 1=none at all; 2=a little bit; 3=some; 4=quite a lot; 5=could not do daily work            |
| 139 | SF8_sf04           | “How much bodily pain have you had during the past 4 weeks?”                                                                                         | 1=none; 2=very mild; 3=mild; 4=moderate; 5=severe; 6=very severe                           |
| 140 | SF8_sf05           | “During the past 4 weeks, how much energy did you have?”                                                                                             | 1=very much; 2=quite a lot; 3=some; 4=a little; 5=none                                     |
| 141 | SF8_sf06           | “During the past 4 weeks, how much did your physical health or emotional problems limit your usual social activities with family or friends?”        | 1=not at all; 2=very little; 3=somewhat; 4=quite a lot; 5=could not do social activities   |
| 142 | SF8_sf07           | “During the past 4 weeks, how much have you been bothered by emotional problems (...) ?”                                                             | 1=not at all; 2=slightly; 3=moderately; 4=quite a lot; 5=extremely.                        |
| 143 | SF8_sf08           | “During the past 4 weeks, how much did personal or emotional problems keep you from doing your usual work, school or other daily activities?”        | 1=not at all; 2=very little; 3=somewhat; 4=quite a lot; 5=could not do daily activities    |
| 144 | SF8_timestamp      | SF8: avg. time needed to fill an item (in secs)                                                                                                      | -                                                                                          |
| 145 | SF8_vitality       | Vitality score                                                                                                                                       | -                                                                                          |

Continued on next page

| No. | Feature           | Description                                                                  | Response options                                      |
|-----|-------------------|------------------------------------------------------------------------------|-------------------------------------------------------|
| 146 | SOZK_gender       | Male gender                                                                  | -                                                     |
| 147 | SOZK_nationality  | German nationality                                                           | -                                                     |
| 148 | SOZK_partnership  | In partnership                                                               | -                                                     |
| 149 | SOZK_divorced     | Divorced                                                                     | -                                                     |
| 150 | SOZK_married      | Married                                                                      | -                                                     |
| 151 | SOZK_unmarried    | Unmarried                                                                    | -                                                     |
| 152 | SOZK_abitur       | Education level: "Abitur"                                                    | -                                                     |
| 153 | SOZK_fachabitur   | Education level: "Fachabitur"                                                | -                                                     |
| 154 | SOZK_lowersec     | Education level: lower secondary school                                      | -                                                     |
| 155 | SOZK_mittltreife  | Education level: "mittlere Reife"                                            | -                                                     |
| 156 | SOZK_geselle      | Education level: "Geselle"                                                   | -                                                     |
| 157 | SOZK_graduate     | Education level: university                                                  | -                                                     |
| 158 | SOZK_nograd       | Education level: none                                                        | -                                                     |
| 159 | SOZK_meister      | Education level: "Meister"                                                   | -                                                     |
| 160 | SOZK_pupil        | Education level: currently pupil or "Azubi"                                  | -                                                     |
| 161 | SOZK_student      | Education level: currently student                                           | -                                                     |
| 162 | SOZK_job          | Job status: currently employed                                               | -                                                     |
| 163 | SOZK_unemp        | Duration of unemployment in the last 5 years                                 | -                                                     |
| 164 | SOZK_employee     | Occupation: employee                                                         | -                                                     |
| 165 | SOZK_worker       | Occupation: worker                                                           | -                                                     |
| 166 | SOZK_civservant   | Occupation: civil servant                                                    | -                                                     |
| 167 | SOZK_occupother   | Occupation: other                                                            | -                                                     |
| 168 | SOZK_selfempl     | Occupation: self-employed                                                    | -                                                     |
| 169 | SOZK_ill          | "How long have you been ill during the last 12 months? (in months)"          | -                                                     |
| 170 | SOZK_tinnitusdur  | "How long have you been suffering from tinnitus (in years)?"                 | -                                                     |
| 171 | SOZK_psychotreat  | "How long have you been in psychotherapeutic treatment? (in months)"         | -                                                     |
| 172 | SOZK_nophysicians | "How many physicians have you visited because of your current complaints?"   | -                                                     |
| 173 | SOZK_timestamp    | SOZK: avg. time needed to fill an item (in secs)                             | -                                                     |
| 174 | SWOP_optimism     | Optimism score                                                               | -                                                     |
| 175 | SWOP_pessimism    | Pessimism score                                                              | -                                                     |
| 176 | SWOP_selfefficacy | Self-efficacy score                                                          | -                                                     |
| 177 | SWOP_swo01        | "If someone makes a stand against me, I will find ways to prevail."          | 1=not true; 2=hardly true; 3=rather true; 4=very true |
| 178 | SWOP_swo02        | "I almost never expect things to go my way."                                 | same as #177                                          |
| 179 | SWOP_swo03        | "I have no trouble realizing my intentions and goals."                       | same as #177                                          |
| 180 | SWOP_swo04        | "I am always optimistic about the future."                                   | same as #177                                          |
| 181 | SWOP_swo05        | "I always know how to behave in unexpected situations."                      | same as #177                                          |
| 182 | SWOP_swo06        | "Things never develop as I wish."                                            | same as #177                                          |
| 183 | SWOP_swo07        | "Even with surprising events, I believe that I will get along well with it." | same as #177                                          |
| 184 | SWOP_swo08        | "I can easily face difficulties because I can always rely on my abilities."  | same as #177                                          |
| 185 | SWOP_swo09        | "I always see the good side of things."                                      | same as #177                                          |
| 186 | SWOP_timestamp    | SWOP: avg. time needed to fill an item (in secs)                             | -                                                     |

Continued on next page

| No. | Feature            | Description                                         | Response options |
|-----|--------------------|-----------------------------------------------------|------------------|
| 187 | TINSKAL_impairment | Degree of tinnitus impairment                       | -                |
| 188 | TINSKAL_frequency  | Tinnitus frequency                                  | -                |
| 189 | TINSKAL_loudness   | Tinnitus loudness                                   | -                |
| 190 | TINSKAL_timestamp  | TINSKAL: avg. time needed to fill an item (in secs) | -                |
| 191 | TLQ_timestamp      | TLQ: avg. time needed to fill an item (in secs)     | -                |
| 192 | TLQ_rightear       | The tinnitus is located in the right ear.           | -                |
| 193 | TLQ_leftear        | The tinnitus is located in the left ear.            | -                |
| 194 | TLQ_bothears       | The tinnitus is located in both ears.               | -                |
| 195 | TLQ_entirehead     | The tinnitus is located in the entire head.         | -                |
| 196 | TLQ_whistling      | Tinnitus noise: whistling                           | -                |
| 197 | TLQ_hissing        | Tinnitus noise: hissing                             | -                |
| 198 | TLQ_ringing        | Tinnitus noise: ringing                             | -                |
| 199 | TLQ_rustling       | Tinnitus noise: rustling                            | -                |
| 200 | age                | patient age                                         | -                |
| 201 | testing_day        | testing date: day of the month                      | -                |
| 202 | testing_month      | testing date: month                                 | -                |
| 203 | testing_week       | testing date: calendar week                         | -                |
| 204 | testing_weekday    | testing date: day of the week                       | -                |
| 205 | testing_yearday    | testing date: day of the year                       | -                |

## References

1. Radloff LS. The CES-D scale: a self-report depression scale for research in the general population. *Applied psychological measurement*. 1977;1(3):385–401.
2. Hautzinger M, Bailer M. ADS-Allgemeine Depressionsskala. In: *Diagnostische Verfahren in der Psychotherapie*. Beltz; 2003.
3. Hörhold M, Bolduan D, Klapp C, Volger H, Scholler G, Klapp B. Testing a screening strategy for identifying psychosomatic patients in gynecologic practice. *Psychotherapie, Psychosomatik, medizinische Psychologie*. 1997;47(5):156–162.
4. Hörhold M, Klapp B, Schimmack U. Testungen der Invarianz und der Hierarchie eines mehrdimensionalen Stimmungsmodells auf der Basis von Zweipunkterhebungen an Patienten- und Studentenstichproben. *Z med Psychol*. 1993;2(1):27–35.
5. Fliege H, Rose M, Arck P, Walter OB, Kocalevent RD, Weber C, et al. The Perceived Stress Questionnaire (PSQ) reconsidered: validation and reference values from different clinical and healthy adult samples. *Psychosomatic medicine*. 2005;67(1):78–88.
6. Bullinger M, Morfeld M. Der SF-36 Health Survey. In: *Gesundheitsökonomische Evaluationen*. Springer; 2008. p. 387–402.
7. Brüggemann P, Szczepek AJ, Rose M, McKenna L, Olze H, Mazurek B. Impact of multiple factors on the degree of tinnitus distress. *Frontiers in human neuroscience*. 2016;10:341.
8. Scholler G, Fliege H, Klapp BF. Fragebogen zu Selbstwirksamkeit, Optimismus und Pessimismus. *Psychother Psychosom Med Psychol*. 1999;49(8):275–283.
9. Goebel G, Hiller W. Psychische Beschwerden bei chronischem Tinnitus: Erprobung und Evaluation des Tinnitus-Fragebogens (TF). *Verhaltenstherapie*. 1992;2(1):13–22.
