# Supplementary material for: Tinnitus-related distress after multimodal treatment can be characterized using a key subset of baseline variables
Source: PLOS journal article supplement (doi:10.1371/journal.pone.0228037), 2020-01-30
Supplement: S3 (10.1371/journal.pone.0228037.s003) [file journal.pone.0228037.s003]

**S3 Table. Comparison of completer and non-completer characteristics.**  
Relative frequencies are given in percent.

| Characteristic                                                         | Completer<br>N=1,416 | Non-Completer<br>N=2,701 |
|------------------------------------------------------------------------|----------------------|--------------------------|
| Age                                                                    |                      |                          |
| 12–19                                                                  | 0.5                  | 1.0                      |
| 20–29                                                                  | 6.7                  | 7.3                      |
| 30–39                                                                  | 13.6                 | 10.3                     |
| 40–49                                                                  | 23.8                 | 22.4                     |
| 50–59                                                                  | 34.5                 | 29.0                     |
| 60–69                                                                  | 16.6                 | 19.5                     |
| 70–79                                                                  | 4.2                  | 9.7                      |
| 80–89                                                                  | 0.0                  | 0.7                      |
| 90                                                                     | -                    | 0.0                      |
| N/A                                                                    | -                    | -                        |
| Gender                                                                 |                      |                          |
| female                                                                 | 50.9                 | 42.0                     |
| male                                                                   | 49.1                 | 50.0                     |
| N/A                                                                    | -                    | 8.0                      |
| Years since tinnitus onset                                             |                      |                          |
| ≤ 0.5                                                                  | 13.7                 | 22.5                     |
| 0.5–1                                                                  | 20.5                 | 17.8                     |
| 1–2                                                                    | 15.7                 | 13.1                     |
| 2–5                                                                    | 16.7                 | 13.4                     |
| > 5                                                                    | 33.3                 | 25.1                     |
| N/A                                                                    | -                    | 8.0                      |
| Education level                                                        |                      |                          |
| Abitur (general qualification for university entrance)                 | 48.0                 | 37.9                     |
| Fachabitur (qualification for university of applied sciences entrance) | 11.6                 | 8.3                      |
| Mittlere Reife ( $\approx$ high school)                                | 28.9                 | 29.4                     |
| Hauptschule (lower secondary education)                                | 11.1                 | 14.6                     |
| other                                                                  | 0.4                  | 1.8                      |
| N/A                                                                    | -                    | 8.0                      |
